# Supplementary material for: The optimal dose of mobilisation therapy in the ICU: a prospective cohort study
Source: PubMed Central journal article supplement (PMC10658796; doi:10.1186/s40560-023-00703-1), 2023-11-20
Supplement: 40560_2023_703_MOESM1_ESM.pdf [file 40560_2023_703_MOESM1_ESM.pdf]

## THE OPTIMAL DOSE OF MOBILISATION THERAPY IN THE ICU - A PROSPECTIVE COHORT STUDY

Marco Lorenz, MD<sup>1,2</sup>, Kristina Fuest, MD<sup>1</sup>, Bernhard Ulm<sup>1,3</sup>, Julius J Grunow, MD<sup>2</sup>, Linus Warner<sup>2</sup>, Annika Bald<sup>2</sup>, Vanessa Arsene<sup>2</sup>, Michael Verfuß<sup>2</sup>, Nils Daum<sup>2</sup>, Manfred Blobner, MD<sup>1,3</sup>, Stefan J Schaller, MD<sup>1,2,\*</sup>

<sup>1</sup> Technical University of Munich, School of Medicine, Department of Anesthesiology and Intensive Care, Munich, Germany

<sup>2</sup> Charité – Universitätsmedizin Berlin, corporate member of Freie Universität Berlin and Humboldt- Universität zu Berlin, Department of Anesthesiology and Intensive Care Medicine (CVK, CCM), Berlin, Germany

<sup>3</sup> Department of Anesthesiology, Universitätsklinikum Ulm, Ulm, Germany

### CONTENT

|                 |    |
|-----------------|----|
| FIGURE S1 ..... | 2  |
| FIGURE S2 ..... | 3  |
| TABLE S1 .....  | 4  |
| TABLE S2 .....  | 5  |
| TABLE S3 .....  | 6  |
| TABLE S4 .....  | 7  |
| TABLE S5 .....  | 8  |
| TABLE S6 .....  | 9  |
| TABLE S7 .....  | 10 |

# Additional file 1. Online supplementary Figures and Tables.

Covariate Balance

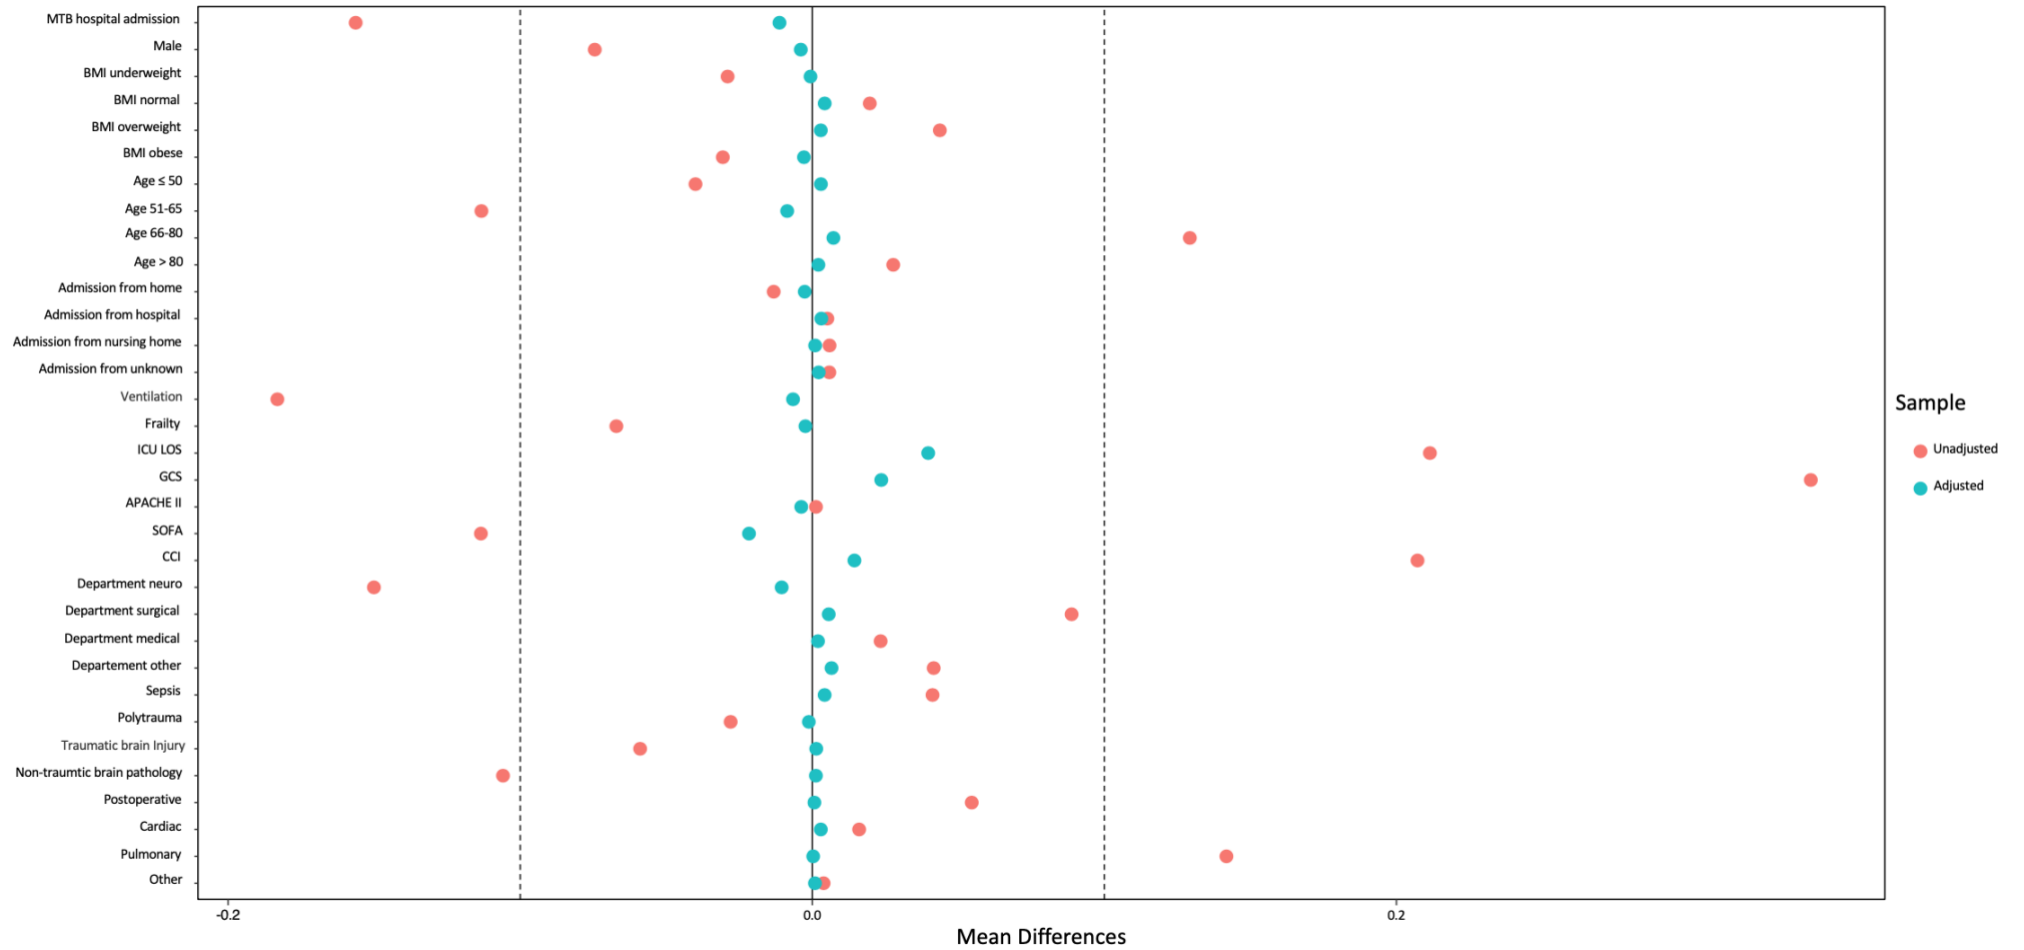

Figure S1 Love plot for the IPW analysis on the change of MTB until ICU discharge. unadjusted = univariate regression model, adjusted = multivariate regression model

# Additional file 1. Online supplementary Figures and Tables.

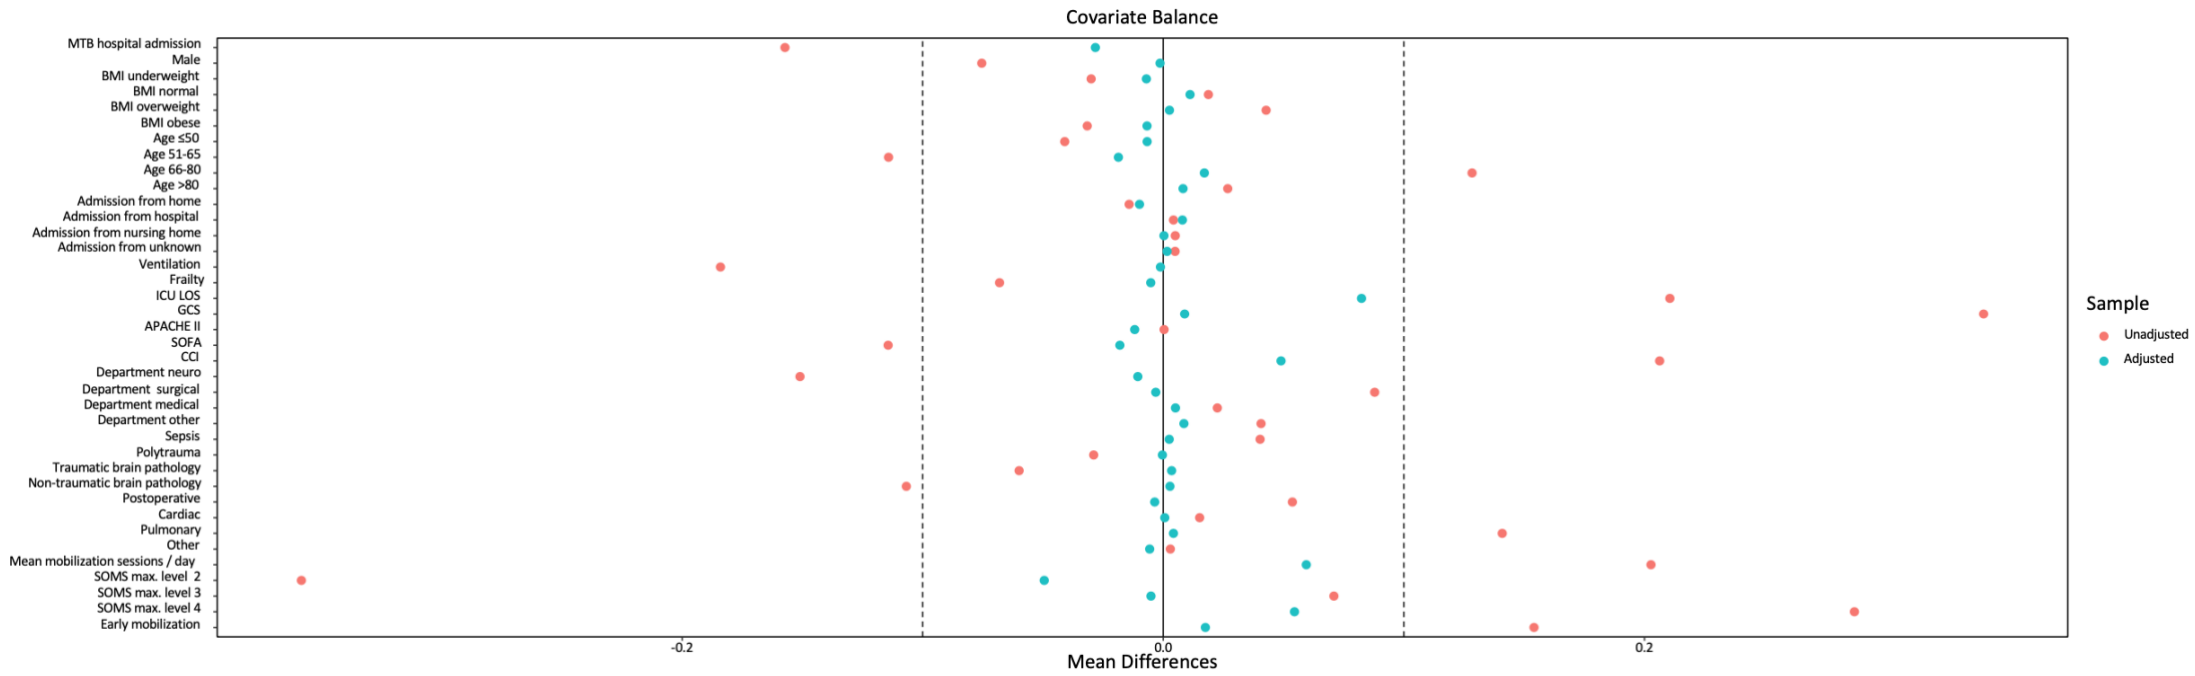

Figure S2 Love plot for the IPW analysis on the change of MTB until ICU discharge (with mobilisation parameters). unadjusted = univariate regression model, adjusted = multivariate regression

## Additional file 1. Online supplementary Figures and Tables.

**Table S1 Average treatment effects (ATE) for the primary endpoint  $\Delta$  MTB till ICU discharge (without mobilisation parameters).** In the adjusted multivariate linear regression model. "Frailty" is defined as Clinical Frailty Scale 5-9, ICU Intensive Care Unit, IQR Interquartile Range, GCS Glasgow-Coma-Scale, APACHE Acute Physiology and Chronic Health Evaluation Score, SOFA Sepsis-related Organ Failure Assessment Score, CCI Charlson-Comorbidity Index, MTB Mobility-Barthel, SOMS Surgical ICU optimal mobilisation score. *Multivariate linear regression models were adjusted for all baseline patient characteristics without mobilisation.*

| Characteristic                            | ATE (95% CI) <sup>1</sup> | p-value |
|-------------------------------------------|---------------------------|---------|
| <b>Duration of mobilisation</b>           |                           | <0.001  |
| <40 minutes per day                       | —                         |         |
| ≥40 minutes per day                       | 3.4 (2.2 to 4.7)          | <0.001  |
| <b>Patient characteristics</b>            |                           |         |
| <b>Sex</b>                                |                           | 0.50    |
| female                                    | —                         |         |
| male                                      | -0.41 (-1.6 to 0.79)      | 0.50    |
| <b>Body-Mass-Index (kg/m<sup>2</sup>)</b> |                           | 0.019   |
| underweight                               | —                         |         |
| normal                                    | 3.2 (0.65 to 5.8)         | 0.014   |
| overweight                                | 2.4 (-0.19 to 5.0)        | 0.069   |
| obese                                     | 4.2 (1.3 to 7.0)          | 0.004   |
| <b>Age Categories (years)</b>             |                           | <0.001  |
| ≤50                                       | —                         |         |
| 51-65                                     | -2.4 (-4.2 to -0.58)      | 0.010   |
| 66-80                                     | -5.1 (-6.9 to -3.2)       | <0.001  |
| >80                                       | -5.2 (-7.5 to -2.9)       | <0.001  |
| <b>ICU admission</b>                      |                           | 0.015   |
| from home                                 | —                         |         |
| from hospital                             | 0.89 (-0.42 to 2.2)       | 0.18    |
| from nursing home                         | 7.0 (1.5 to 12)           | 0.013   |
| Unknown                                   | -7.5 (-16 to 1.2)         | 0.092   |
| Invasive mechanical ventilation (yes)     | -2.5 (-3.9 to -1.1)       | <0.001  |
| Frailty (non-frail)                       | -3.7 (-5.2 to -2.2)       | <0.001  |
| <b>Scoring</b>                            |                           |         |
| ICU LOS                                   | -0.05 (-0.08 to -0.01)    | 0.009   |
| GCS                                       | 0.09 (-0.12 to 0.30)      | 0.41    |
| APACHE II                                 | 0.11 (-0.05 to 0.26)      | 0.18    |
| SOFA                                      | 0.11 (-0.16 to 0.38)      | 0.41    |
| CCI                                       | -0.09 (-0.38 to 0.19)     | 0.53    |
| <b>Department</b>                         |                           | 0.77    |
| Neurocritical                             | —                         |         |
| Surgical                                  | -0.41 (-2.1 to 1.3)       | 0.63    |
| Medical                                   | 0.27 (-2.7 to 3.2)        | 0.86    |
| Other                                     | -1.5 (-4.8 to 1.7)        | 0.35    |
| <b>ICU admission reasons</b>              |                           |         |
| Sepsis (yes)                              | -0.41 (-2.5 to 1.7)       | 0.71    |
| Polytrauma (yes)                          | -2.4 (-5.7 to 0.83)       | 0.14    |
| Traumatic Brain Injury (yes)              | -1.7 (-4.3 to 0.82)       | 0.18    |
| Non-traumatic Brain pathology (yes)       | -0.96 (-3.3 to 1.4)       | 0.43    |
| Postoperative (yes)                       | -0.97 (-2.8 to 0.85)      | 0.30    |
| Cardiac (yes)                             | -0.11 (-3.0 to 2.7)       | 0.94    |
| Pulmonary (yes)                           | 0.00 (-1.6 to 1.6)        | >0.99   |
| Other (yes)                               | 0.38 (-1.9 to 2.6)        | 0.74    |

<sup>1</sup> CI = Confidence interval

## Additional file 1. Online supplementary Figures and Tables.

**Table S2 Logistic regression model for treatment estimation distribution to calculate the inverse probability weighting for  $\geq 40$  minutes per day mobilisation (without mobilisation parameters).** “Frailty” is defined as Clinical Frailty Scale 5-9, ICU Intensive Care Unit, IQR Interquartile Range, GCS Glasgow-Coma-Scale, APACHE Acute Physiology and Chronic Health Evaluation Score, SOFA Sepsis-related Organ Failure Assessment Score, CCI Charlson-Comorbidity Index, MTB Mobility-Barthel, SOMS Surgical ICU optimal mobilisation score

| Characteristic                        | ATE (95% CI) <sup>1</sup> | p-value |
|---------------------------------------|---------------------------|---------|
| <b>Patient characteristics</b>        |                           |         |
| Sex                                   |                           |         |
| female                                | —                         |         |
| male                                  | 0.70 (0.49 to 1.00)       | 0.051   |
| Body-Mass-Index (kg/m <sup>2</sup> )  |                           |         |
| underweight                           | —                         | 0.092   |
| normal                                | 2.26 (1.05 to 5.20)       | 0.044   |
| overweight                            | 2.30 (1.06 to 5.30)       | 0.041   |
| obese                                 | 1.55 (0.66 to 3.83)       | 0.33    |
| Age Categories (years)                |                           |         |
| ≤50                                   | —                         | 0.024   |
| 51-65                                 | 0.60 (0.35 to 1.04)       | 0.067   |
| 66-80                                 | 1.09 (0.64 to 1.88)       | 0.75    |
| >80                                   | 1.19 (0.61 to 2.34)       | 0.61    |
| ICU admission                         |                           |         |
| from home                             | —                         | 0.78    |
| from hospital                         | 1.15 (0.78 to 1.70)       | 0.49    |
| from nursing home                     | 1.29 (0.26 to 6.54)       | 0.75    |
| Unknown                               | 2.59 (0.23 to 58.1)       | 0.45    |
| Invasive mechanical ventilation (yes) | 0.50 (0.33 to 0.76)       | <0.001  |
| Frailty (non-frail)                   | 0.86 (0.56 to 1.34)       | 0.52    |
| <b>Scoring</b>                        |                           |         |
| ICU LOS                               | 1.02 (1.01 to 1.04)       | <0.001  |
| GCS                                   | 1.04 (0.98 to 1.11)       | 0.20    |
| Apache II                             | 1.02 (0.97 to 1.06)       | 0.51    |
| SOFA                                  | 0.96 (0.88 to 1.04)       | 0.29    |
| CCI                                   | 1.03 (0.95 to 1.12)       | 0.45    |
| <b>Department</b>                     |                           |         |
| Neurocritical                         | —                         | 0.011   |
| Surgical                              | 1.61 (0.99 to 2.64)       | 0.057   |
| Medical                               | 1.82 (0.78 to 4.22)       | 0.16    |
| Other                                 | 4.53 (1.78 to 12.2)       | 0.002   |
| <b>ICU admission reasons</b>          |                           |         |
| Sepsis (yes)                          | 1.19 (0.65 to 2.19)       | 0.57    |
| Polytrauma (yes)                      | 0.53 (0.17 to 1.45)       | 0.22    |
| Traumatic Brain Injury (yes)          | 0.85 (0.39 to 1.82)       | 0.68    |
| Non-traumatic Brain pathology (yes)   | 0.74 (0.36 to 1.51)       | 0.41    |
| Postoperative (yes)                   | 1.01 (0.59 to 1.73)       | 0.96    |
| Cardiac (yes)                         | 0.98 (0.43 to 2.21)       | 0.96    |
| Pulmonary (yes)                       | 1.50 (0.93 to 2.42)       | 0.093   |
| Other (yes)                           | 0.92 (0.48 to 1.77)       | 0.80    |

<sup>1</sup> OR = Odds Ratio, CI = Confidence Interval

## Additional file 1. Online supplementary Figures and Tables.

**Table S3 Average treatment effects (ATE) for the primary endpoint  $\Delta$  MTB till ICU discharge (with mobilisation parameters).** In the adjusted multivariate linear regression model. “Frailty” is defined as Clinical Frailty Scale 5-9, ICU Intensive Care Unit, IQR Interquartile Range, GCS Glasgow-Coma-Scale, APACHE Acute Physiology and Chronic Health Evaluation Score, SOFA Sepsis-related Organ Failure Assessment Score, CCI Charlson-Comorbidity Index, MTB Mobility-Barthel, SOMS Surgical ICU optimal mobilisation score. *Multivariate linear regression models were adjusted for all baseline patient characteristics with mobilisation.*

| Characteristic                               | ATE (95% CI) <sup>1</sup> | p-value |
|----------------------------------------------|---------------------------|---------|
| <b>Duration of mobilisation</b>              |                           | 0.16    |
| <40 minutes per day                          | —                         |         |
| ≥40 minutes per day                          | 1.0 (-0.41 to 2.4)        | 0.16    |
| <b>Patient characteristics</b>               |                           |         |
| <b>Sex</b>                                   |                           | 0.79    |
| female                                       | —                         |         |
| male                                         | -0.17 (-1.4 to 1.1)       | 0.79    |
| <b>Body-Mass-Index (kg/m<sup>2</sup>)</b>    |                           | 0.020   |
| underweight                                  | —                         |         |
| normal                                       | 3.1 (0.32 to 6.0)         | 0.029   |
| overweight                                   | 2.5 (-0.36 to 5.3)        | 0.087   |
| obese                                        | 4.5 (1.4 to 7.6)          | 0.004   |
| <b>Age</b>                                   |                           | 0.002   |
| ≤50                                          | —                         |         |
| 51-65                                        | -1.8 (-3.6 to -0.01)      | 0.049   |
| 66-80                                        | -3.6 (-5.4 to -1.7)       | <0.001  |
| >80                                          | -3.5 (-5.9 to -1.1)       | 0.004   |
| <b>ICU admission</b>                         |                           | 0.039   |
| from home                                    | —                         |         |
| from hospital                                | 1.1 (-0.24 to 2.5)        | 0.11    |
| from nursing home                            | 5.7 (0.18 to 11)          | 0.043   |
| Unknown                                      | -5.9 (-14 to 2.2)         | 0.15    |
| <b>Invasive mechanical ventilation (yes)</b> |                           | 0.058   |
| no                                           | —                         |         |
| yes                                          |                           | 0.058   |
| <b>Frailty (non-frail)</b>                   |                           | <0.001  |
| <b>Scoring</b>                               |                           |         |
| ICU LOS                                      | -0.05 (-0.09 to 0.00)     | 0.029   |
| GCS                                          | -0.03 (-0.25 to 0.20)     | 0.81    |
| APACHE 2                                     | 0.05 (-0.11 to 0.21)      | 0.53    |
| SOFA                                         | 0.06 (-0.22 to 0.34)      | 0.66    |
| CCI                                          | 0.11 (-0.19 to 0.41)      | 0.47    |
| <b>Department</b>                            |                           | 0.18    |
| Neurocritical                                | —                         |         |
| Surgical                                     | -1.4 (-3.1 to 0.42)       | 0.13    |
| Medical                                      | 1.0 (-2.0 to 4.0)         | 0.52    |
| Other                                        | -2.1 (-5.4 to 1.2)        | 0.21    |
| <b>ICU admission reasons</b>                 |                           |         |
| Sepsis (yes)                                 | 1.3 (-0.99 to 3.6)        | 0.27    |
| Polytrauma (yes)                             | -1.9 (-5.2 to 1.5)        | 0.27    |
| Traumatic Brain Injury (yes)                 | -0.87 (-3.5 to 1.8)       | 0.52    |
| Non-traumatic Brain pathology (yes)          | 0.15 (-2.3 to 2.6)        | 0.90    |
| Postoperative (yes)                          | -0.69 (-2.6 to 1.2)       | 0.47    |
| Cardiac (yes)                                | 0.05 (-2.9 to 3.1)        | 0.97    |
| Pulmonary (yes)                              | -0.07 (-1.8 to 1.6)       | 0.93    |
| Other (yes)                                  | 1.5 (-0.76 to 3.8)        | 0.19    |
| <b>Mobilisation parameters</b>               |                           |         |
| Mean mobilisation sessions per day           | -1.2 (-3.9 to 1.5)        | 0.39    |
| Maximum SOMS level reached                   |                           | <0.001  |
| 2                                            | —                         |         |
| 3                                            | 1.8 (0.19 to 3.3)         | 0.028   |
| 4                                            | 9.4 (7.6 to 11)           | <0.001  |
| <b>Early mobilisation (yes)</b>              |                           | 0.47    |
|                                              | 0.55 (-0.93 to 2.0)       |         |

<sup>1</sup> CI = Confidence Interval

## Additional file 1. Online supplementary Figures and Tables.

**Table S4 Logistic regression model for treatment estimation distribution to calculate the inverse probability weighting for ≥40 minutes per day mobilisation (with mobilisation parameters).** “Frailty” is defined as Clinical Frailty Scale 5-9, ICU Intensive Care Unit, IQR Interquartile Range, GCS Glasgow-Coma-Scale, APACHE Acute Physiology and Chronic Health Evaluation Score, SOFA Sepsis-related Organ Failure Assessment Score, CCI Charlson-Comorbidity Index, MTB Mobility-Barthel, SOMS Surgical ICU optimal mobilisation score

| Characteristic                        | OR (95% CI) <sup>‡</sup> | p-value |
|---------------------------------------|--------------------------|---------|
| <b>Patient characteristics</b>        |                          |         |
| Sex                                   |                          | 0.30    |
| female                                | —                        |         |
| male                                  | 0.81 (0.55 to 1.20)      | 0.30    |
| Body-Mass-Index (kg/m <sup>2</sup> )  |                          | 0.023   |
| underweight                           | —                        |         |
| normal                                | 3.31 (1.44 to 8.05)      | 0.006   |
| overweight                            | 3.29 (1.43 to 8.01)      | 0.006   |
| obese                                 | 2.29 (0.91 to 6.01)      | 0.082   |
| Age                                   |                          | <0.001  |
| ≤50                                   | —                        |         |
| 51-65                                 | 0.66 (0.36 to 1.21)      | 0.18    |
| 66-80                                 | 1.58 (0.86 to 2.89)      | 0.14    |
| >80                                   | 2.24 (1.04 to 4.86)      | 0.039   |
| ICU admission                         |                          | 0.37    |
| from home                             | —                        |         |
| from hospital                         | 1.32 (0.86 to 2.05)      | 0.21    |
| from nursing home                     | 2.85 (0.42 to 17.6)      | 0.26    |
| Unknown                               | 2.93 (0.20 to 74.5)      | 0.43    |
| Invasive mechanical ventilation (yes) | 0.59 (0.37 to 0.93)      | 0.024   |
| Frailty (non-frail)                   | 0.72 (0.44 to 1.18)      | 0.20    |
| <b>Scoring</b>                        |                          |         |
| ICU LOS                               | 1.03 (1.02 to 1.05)      | <0.001  |
| GCS                                   | 1.00 (0.93 to 1.07)      | 0.99    |
| APACHE 2                              | 1.00 (0.95 to 1.05)      | 0.98    |
| SOFA                                  | 0.98 (0.90 to 1.07)      | 0.69    |
| CCI                                   | 1.07 (0.97 to 1.17)      | 0.16    |
| <b>Department</b>                     |                          |         |
| Neurocritical                         | —                        | 0.080   |
| Surgical                              | 0.94 (0.54 to 1.64)      | 0.83    |
| Medical                               | 1.52 (0.59 to 3.93)      | 0.39    |
| Other                                 | 3.04 (1.11 to 8.81)      | 0.035   |
| <b>ICU admission reasons</b>          |                          |         |
| Sepsis (yes)                          | 1.34 (0.69 to 2.64)      | 0.39    |
| Polytrauma (yes)                      | 0.81 (0.23 to 2.72)      | 0.74    |
| Traumatic Brain Injury (yes)          | 0.92 (0.38 to 2.19)      | 0.85    |
| Non-traumatic Brain pathology (yes)   | 0.83 (0.37 to 1.88)      | 0.66    |
| Postoperative (yes)                   | 0.94 (0.52 to 1.71)      | 0.85    |
| Cardiac (yes)                         | 0.82 (0.33 to 2.07)      | 0.67    |
| Pulmonary (yes)                       | 1.41 (0.83 to 2.40)      | 0.20    |
| Other (yes)                           | 1.03 (0.50 to 2.15)      | 0.93    |
| <b>Mobilisation parameters</b>        |                          |         |
| Mean mobilisation sessions per day    | 2.38 (1.04 to 5.53)      | 0.041   |
| Maximum SOMS level reached            |                          | <0.001  |
| 2                                     | —                        |         |
| 3                                     | 5.00 (2.95 to 8.74)      | <0.001  |
| 4                                     | 14.6 (8.16 to 27.0)      | <0.001  |
| Early mobilisation (yes)              | 1.59 (0.99 to 2.56)      | 0.055   |

<sup>‡</sup> OR = Odds Ratio, CI = Confidence Interval

## Additional file 1. Online supplementary Figures and Tables.

**Table S5 Average treatment effects (ATE) for the secondary endpoint  $\Delta$  MTB till hospital discharge (without mobilisation parameters).** In the adjusted multivariate linear regression model. "Frailty" is defined as Clinical Frailty Scale 5-9, ICU Intensive Care Unit, IQR Interquartile Range, GCS Glasgow-Coma-Scale, APACHE Acute Physiology and Chronic Health Evaluation Score, SOFA Sepsis-related Organ Failure Assessment Score, CCI Charlson-Comorbidity Index, MTB Mobility-Barthel, SOMS Surgical ICU optimal mobilisation score. *Multivariate linear regression models were adjusted for all baseline patient characteristics without mobilisation.*

| Characteristic                        | ATE (95% CI) <sup>‡</sup> | p-value |
|---------------------------------------|---------------------------|---------|
| <b>Duration of mobilisation</b>       |                           | 0.008   |
| <40 minutes per day                   | —                         |         |
| ≥40 minutes per day                   | 2.2 (0.59 to 3.9)         | 0.008   |
| <b>Sex</b>                            |                           | 0.18    |
| female                                | —                         |         |
| male                                  | -1.1 (-2.7 to 0.50)       | 0.18    |
| <b>BMI (kg/m<sup>2</sup>)</b>         |                           | 0.070   |
| underweight                           | —                         |         |
| normal                                | -0.29 (-3.7 to 3.1)       | 0.87    |
| overweight                            | -2.1 (-5.5 to 1.2)        | 0.21    |
| obese                                 | 0.43 (-3.3 to 4.1)        | 0.82    |
| <b>Age</b>                            |                           | <0.001  |
| ≤50                                   | —                         |         |
| 51-65                                 | -3.0 (-5.4 to -0.66)      | 0.012   |
| 66-80                                 | -5.5 (-8.0 to -3.1)       | <0.001  |
| >80                                   | -9.0 (-12 to -5.9)        | <0.001  |
| <b>ICU admission</b>                  |                           | 0.53    |
| from home                             | —                         |         |
| from hospital                         | 0.16 (-1.6 to 1.9)        | 0.85    |
| from nursing home                     | 5.4 (-1.8 to 13)          | 0.14    |
| Unknown                               | -1.7 (-13 to 9.7)         | 0.77    |
| Invasive mechanical ventilation (yes) | -1.3 (-3.2 to 0.56)       | 0.17    |
| Frailty (non-frail)                   | -0.28 (-2.3 to 1.7)       | 0.78    |
| <b>Scoring</b>                        |                           |         |
| ICU LOS                               | -0.20 (-0.24 to -0.15)    | <0.001  |
| GCS                                   | 0.21 (-0.06 to 0.49)      | 0.13    |
| APACHE II                             | 0.12 (-0.08 to 0.33)      | 0.24    |
| SOFA                                  | -0.31 (-0.66 to 0.04)     | 0.083   |
| CCI                                   | -0.30 (-0.67 to 0.07)     | 0.12    |
| <b>Department</b>                     |                           | <0.001  |
| Neurocritical                         | —                         |         |
| Surgical                              | 5.8 (3.6 to 8.0)          | <0.001  |
| Medical                               | 3.9 (-0.04 to 7.8)        | 0.052   |
| Other                                 | 3.8 (-0.47 to 8.0)        | 0.081   |
| <b>ICU admission reasons</b>          |                           |         |
| Sepsis (yes)                          | 0.14 (-2.6 to 2.9)        | 0.92    |
| Polytrauma (yes)                      | -1.7 (-6.0 to 2.5)        | 0.42    |
| Traumatic Brain Injury (yes)          | -1.7 (-5.1 to 1.6)        | 0.31    |
| Non-traumatic Brain pathology (yes)   | -0.58 (-3.7 to 2.5)       | 0.72    |
| Postoperative (yes)                   | 1.2 (-1.2 to 3.6)         | 0.32    |
| Cardiac (yes)                         | -3.1 (-6.8 to 0.66)       | 0.11    |
| Pulmonary (yes)                       | -0.48 (-2.6 to 1.7)       | 0.66    |
| Other (yes)                           | -1.3 (-4.2 to 1.6)        | 0.38    |

<sup>‡</sup> CI = Confidence Interval



## Additional file 1. Online supplementary Figures and Tables.

**Table S6 Average treatment effects (ATE) for the secondary endpoint  $\Delta$  MTB till hospital discharge (with mobilisation parameters).** In the adjusted multivariate linear regression model. “Frailty” is defined as Clinical Frailty Scale 5-9, ICU Intensive Care Unit, IQR Interquartile Range, GCS Glasgow-Coma-Scale, APACHE Acute Physiology and Chronic Health Evaluation Score, SOFA Sepsis-related Organ Failure Assessment Score, CCI Charlson-Comorbidity Index, MTB Mobility-Barthel, SOMS Surgical ICU optimal mobilisation score. *Multivariate linear regression models were adjusted for all baseline patient characteristics with mobilisation.*

| Characteristic                               | ATE (95% CI) <sup>‡</sup> | p-value |
|----------------------------------------------|---------------------------|---------|
| <b>Duration of mobilisation</b>              |                           | 0.39    |
| <40 minutes per day                          | —                         |         |
| ≥40 minutes per day                          | -0.74 (-2.4 to 0.96)      | 0.39    |
| <b>Sex</b>                                   |                           | 0.49    |
| female                                       | —                         |         |
| male                                         | -0.53 (-2.0 to 0.97)      | 0.49    |
| <b>Body-Mass-Index (kg/m<sup>2</sup>)</b>    |                           | 0.037   |
| underweight                                  | —                         |         |
| normal                                       | 0.85 (-2.4 to 4.0)        | 0.60    |
| overweight                                   | -1.2 (-4.4 to 2.1)        | 0.48    |
| obese                                        | 1.5 (-2.0 to 5.1)         | 0.39    |
| <b>Age Categories (years)</b>                |                           | <0.001  |
| ≤50                                          | —                         |         |
| 51-65                                        | -2.9 (-5.1 to -0.64)      | 0.012   |
| 66-80                                        | -4.5 (-6.8 to -2.2)       | <0.001  |
| >80                                          | -7.2 (-10 to -4.3)        | <0.001  |
| <b>ICU admission</b>                         |                           | 0.18    |
| from home                                    | —                         |         |
| from hospital                                | 0.81 (-0.84 to 2.4)       | 0.34    |
| from nursing home                            | 7.2 (0.33 to 14)          | 0.040   |
| unknown                                      | -0.90 (-12 to 9.9)        | 0.87    |
| <b>Invasive mechanical ventilation (yes)</b> | -1.0 (-2.8 to 0.76)       | 0.26    |
| <b>Frailty (non-frail)</b>                   | -0.95 (-2.9 to 0.96)      | 0.33    |
| <b>Scoring</b>                               |                           |         |
| ICU LOS                                      | -0.19 (-0.24 to -0.13)    | <0.001  |
| GCS                                          | 0.10 (-0.17 to 0.36)      | 0.47    |
| APACHE II                                    | 0.08 (-0.11 to 0.28)      | 0.40    |
| SOFA                                         | -0.24 (-0.58 to 0.09)     | 0.15    |
| CCI                                          | -0.16 (-0.52 to 0.19)     | 0.37    |
| <b>Department</b>                            |                           | 0.001   |
| Neurocritical                                | —                         |         |
| Surgical                                     | 4.3 (2.2 to 6.4)          | <0.001  |
| Medical                                      | 3.6 (-0.11 to 7.3)        | 0.057   |
| Other                                        | 2.5 (-1.5 to 6.6)         | 0.22    |
| <b>ICU admission reasons</b>                 |                           |         |
| Sepsis (yes)                                 | 0.46 (-2.2 to 3.1)        | 0.73    |
| Polytrauma (yes)                             | 0.22 (-3.9 to 4.3)        | 0.92    |
| Traumatic Brain Injury (yes)                 | -0.98 (-4.1 to 2.2)       | 0.54    |
| Non-traumatic Brain pathology (yes)          | -0.07 (-3.0 to 2.9)       | 0.96    |
| Postoperative (yes)                          | 1.4 (-0.86 to 3.7)        | 0.22    |
| Cardiac (yes)                                | -3.2 (-6.7 to 0.36)       | 0.078   |
| Pulmonary (yes)                              | -0.37 (-2.4 to 1.7)       | 0.72    |
| Other (yes)                                  | -0.83 (-3.6 to 2.0)       | 0.56    |
| <b>Mobilisation parameters</b>               |                           |         |
| Mean mobilisation sessions per day           | 1.7 (-1.7 to 5.1)         | 0.33    |
| Maximum SOMS level reached                   |                           | <0.001  |
| 2                                            | —                         |         |
| 3                                            | 5.4 (3.5 to 7.3)          | <0.001  |
| 4                                            | 9.4 (7.2 to 12)           | <0.001  |
| <b>Early mobilisation (yes)</b>              | -0.07 (-1.8 to 1.7)       | 0.94    |

<sup>‡</sup> CI = Confidence Interval

## Additional file 1. Online supplementary Figures and Tables.

**Table S7 Analyses with different imputation methods for deceased patients.** Average treatment effects (ATE) of  $\geq 40$  min daily mobilisation for deceased patients on the primary and secondary endpoint, calculated using univariate, multivariate, and weighted linear regression models. Multivariate linear regression models were adjusted for all baseline patient characteristics once without mobilisation parameters and once with. Inverse probability weighting was performed in the same manner. MTB = Mobility-Transfer-Barthel (sum score of the subdomains Mobility and Transfer of the Barthel score), ICU = intensive care unit, IPW = inverse probability weighting.

|                                             |                                | Change in MTB until |         |                     |         |
|---------------------------------------------|--------------------------------|---------------------|---------|---------------------|---------|
|                                             |                                | ICU discharge       |         | Hospital discharge  |         |
|                                             |                                | ATE [95% CI]        | p-value | ATE [95% CI]        | p-value |
| <b>Imputation with 0</b>                    | Univariate analysis            | 3.9 [2.7 to 5.1]    | <0.001  | 2.9 [1.2 to 4.6]    | 0.001   |
|                                             | Multivariate analysis          | 3.9 [2.7 to 5.1]    | <0.001  | 3.0 [1.4 to 4.6]    | <0.001  |
|                                             | Multivariate with mobilisation | 0.84 [-0.34 to 2.0] | 0.16    | -0.43 [-2.1 to 1.2] | 0.61    |
|                                             | IPW                            | 3.7 [2.5 to 4.9]    | <0.001  | 2.9 [1.2 to 4.6]    | 0.001   |
|                                             | IPW with mobilisation          | 0.90 [-0.30 to 2.1] | 0.14    | -0.41 [-2.2 to 1.3] | 0.65    |
| <b>Imputation with carry forward method</b> | Univariate analysis            | 3.9 [2.7 to 5.1]    | <0.001  | 3.1 [1.4 to 4.9]    | <0.001  |
|                                             | Multivariate analysis          | 3.8 [2.6 to 5.1]    | <0.001  | 3.2 [1.6 to 4.8]    | <0.001  |
|                                             | Multivariate with mobilisation | 0.96 [-0.26 to 2.2] | 0.12    | -0.06 [-1.7 to 1.6] | 0.94    |
|                                             | IPW                            | 3.6 [2.4 to 4.8]    | <0.001  | 3.0 [1.3 to 4.7]    | <0.001  |
|                                             | IPW with mobilisation          | 0.93 [-0.29 to 2.1] | 0.14    | -0.11 [-1.9 to 1.6] | 0.90    |
| <b>Imputation with Jump to reference</b>    | Univariate analysis            | 3.8 [2.6 to 5.1]    | <0.001  | 3.1 [1.2 to 4.8]    | <0.001  |
|                                             | Multivariate analysis          | 3.8 [2.6 to 5.1]    | <0.001  | 3.1 [1.5 to 4.6]    | <0.001  |
|                                             | Multivariate with mobilisation | 0.88 [-0.33 to 2.1] | 0.15    | -0.25 [-1.9 to 1.4] | 0.77    |
|                                             | IPW                            | 3.7 [2.4 to 5.0]    | <0.001  | 2.9 [1.3 to 4.5]    | 0.001   |
|                                             | IPW with mobilisation          | 0.41 [-1.1 to 1.9]  | 0.59    | -1.1 [-3.6 to 1.3]  | 0.36    |
